# Supplementary material
Source: Springer Nature journal article supplement (https://www.springermedizin.de/resource/supplementary/12913_2013_3097_MOESM1_ESM.pdf/9532304)
Supplement: MOESM1 [file 9532304]

Mothers in community

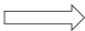

Public health nurses

**Data:**

Parenting consultation

- Reported concerns

Peer discussions

- Perceives challenges
- Suggested strategies

**Analysis:** 1. KH Coder: Computerized coding

2. Steps Coding and Theorization:

Systematic summation
